# Supplementary material for: Unusual Rh nanocrystal morphology control by hetero-epitaxially growing Rh on Au@Pt nanowires with numerous vertical twinning boundaries
Source: Royal Society of Chemistry journal article supplement (doi:10.1039/c5nr00999e), 2015-01-01
Supplement: c5nr00999e1.pdf [file c5nr00999e1.pdf]

## Electronic Supporting Information

### Material Characterizations

Transmission electron microscopy (TEM) and high-resolution TEM were performed on a TECNAI G2 20 S-Twin operated at 200kV and TECNAI G2 F30 operated at 300 kV. X-ray diffraction (XRD) patterns were collected with a Rigaku UltimaIII diffractometer system using a graphite-monochromatized Cu-K $\alpha$  radiation at 40kV and 40mA. The BET (Brunauer -Emmett -Teller) surface area measurement was made using a conventional BET single-point N<sub>2</sub> physisorption apparatus (Micromeritics ASAP 2020 Surface Area and Porosity Analyzer).

### Experimental Section

**Preparation of Rh rods on Au@Pt nanowires (Fig. 1):** Au@Pt Nanowires (1 mg) were dispersed in a mixture of Rh(acac)<sub>3</sub> (0.05 mmol, Strem, 99%), 1,2-hexadecanediol (0.93 mmol, Aldrich, 90%) and octadecylamine (15 mmol, Aldrich, technical grade, 90%) in a 100 mL Schlenk tube with a magnetic stirring at 100 °C. After being evacuated for 10 min with stirring at 100 °C, the solution was heated up to 130 °C at a heating rate of 5 °C/min and kept at the same temperature for 20 h under Ar gas condition. Finally, dark black precipitates could be obtained by cooling down the solution to room temperature and then by centrifugation with added methanol/toluene (v/v = 10 mL/15 mL).

**Preparation of Rh plates on Au@Pt nanowires (Fig. 2):** Au@Pt Nanowires (1 mg) were dispersed in a mixture of Rh(acac)<sub>3</sub> (0.05 mmol, Strem, 99%), 1,2-hexadecanediol (0.93 mmol, Aldrich, 90%) and octadecylamine (15 mmol, Aldrich, technical grade, 90%) in a 100 mL Schlenk tube with a magnetic stirring at 100 °C. After being evacuated for 10 min with stirring at 100 °C, the solution was heated up to 180 °C at a heating rate of 5 °C/min and kept at the same temperature for 14 h under Ar gas condition. Finally, dark black precipitates could be obtained by cooling down the solution to room temperature and then by centrifugation with added methanol/toluene (v/v = 10 mL/15 mL).

**Preparation of entangled mane-like Rh branches on Au@Pt nanowires (Fig. 4):** Au@Pt Nanowires (1 mg) were dispersed in a mixture of Rh(acac)<sub>3</sub> (0.05 mmol, Strem, 99%), 1,2-hexadecanediol (0.93 mmol, Aldrich, 90%) and octadecylamine (15 mmol, Aldrich, technical grade, 90%) in a 100 mL Schlenk tube with a magnetic stirring at 100 °C. After being evacuated for 10 min with stirring at 100 °C, the Schlenk tube containing the reaction mixture was directly placed in an oil bath, pre-heated to 180 °C, and kept at the same temperature for 14 h under Ar gas condition. Finally, dark black precipitates could be obtained by cooling down the solution to room temperature and then by centrifugation with added methanol/toluene (v/v = 10 mL/15 mL).

**Preparation of single crystal Pt nanorods (Fig. S4):** A slurry of Pt(acac)<sub>2</sub> (0.015 mmol, Aldrich, 99 %), hexadecyltrimethylammonium chloride (0.8 mmol, Aldrich, 98%), and octadecylamine (15 mmol, Aldrich, technical grade, 90%) was prepared in a 100 mL Schlenk tube with a magnetic stirring at 100 °C. After being evacuated for 10 min with stirring at 100 °C, the reaction mixture was purged with 1 atm CO gas. The Schlenk tube containing the reaction mixture was directly placed in an oil bath, pre-heated to 200 °C, and kept at the same temperature for 8 h under 1 atm CO. Finally, dark black precipitates could be obtained by cooling down the solution to room temperature and then by centrifugation with added methanol/toluene (v/v = 10 mL/15 mL).

**Preparation of sample for BET analysis:** The samples (each xxx mg) were prepared by heating at 150 °C for 1h with a flow of N<sub>2</sub> gas across the sample tube for removal of liberated contaminants.

**Fig. S1.** (a) Low and (b) high resolution TEM images of Au@Pt nanowires.

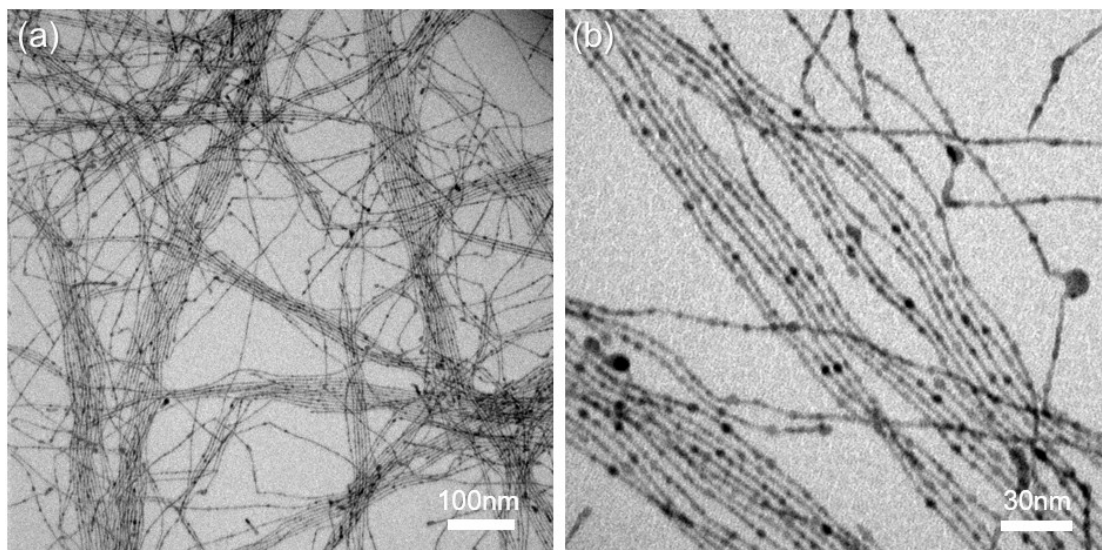

**Fig. S2.** TEM images of Rh nanorods on Au@Pt nanowire (ROW) recorded at various grid tilting angles: (a) 0°, (b) 15° and (c) 30°.

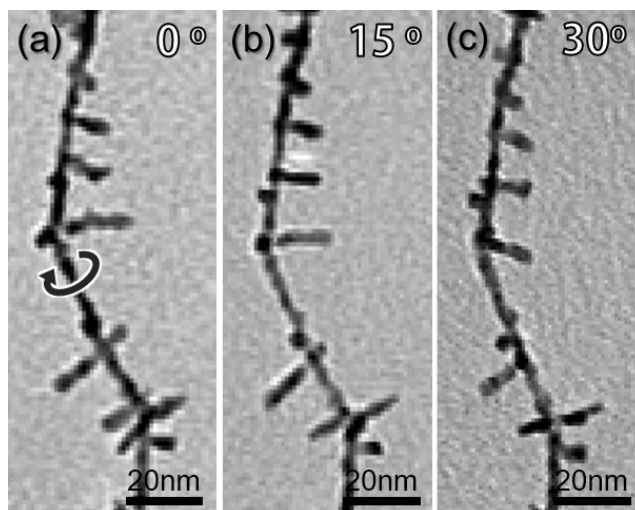

**Fig. S3.** TEM images of (a) Au@Pt nanoparticles and (b) Rh rods on Au@Pt nanoparticles. (c) HRTEM image of Rh nanorods grown on the twinning boundaries. Red arrows indicate the direction of Rh nanorod growth.

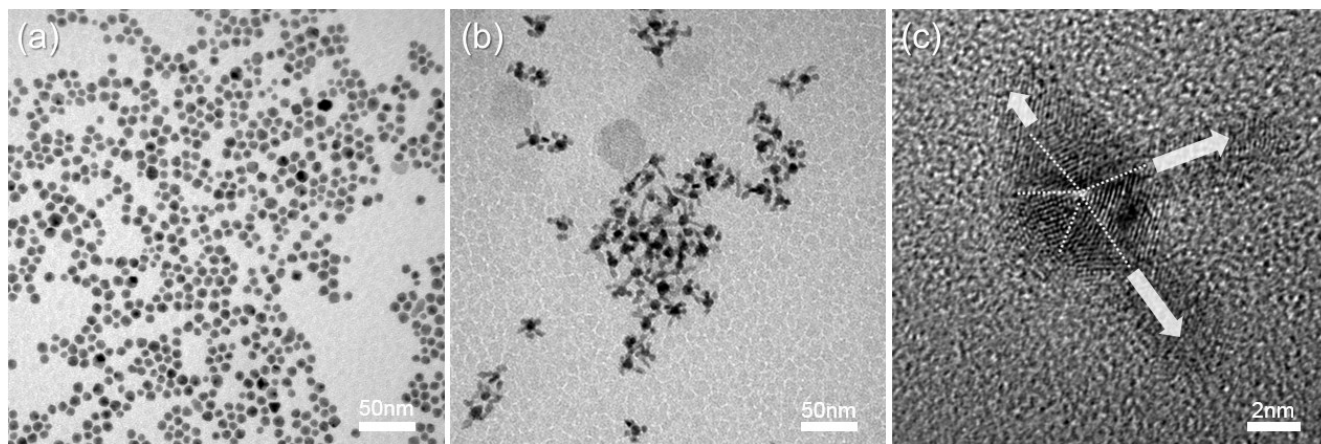

**Fig. S4.** (a) TEM image and (b) HRTEM image of single crystalline Pt nanorods (inset: corresponding FFT image). (c) TEM image for Ru/Pt nanostructures from Rh growth on single crystalline Pt nanorods.

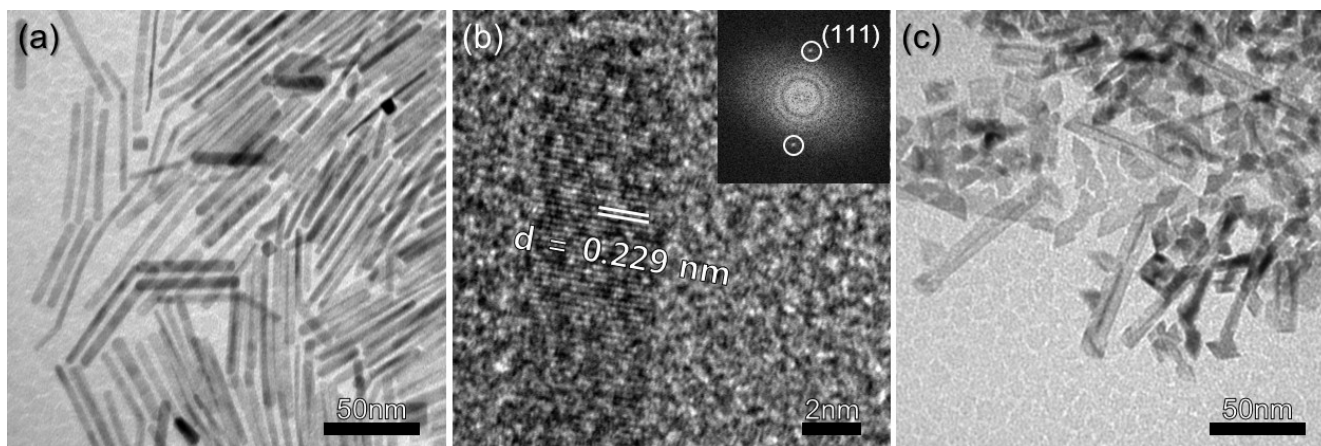

**Fig. S5.** (a) TEM image of triangular and trapezoidal-shaped Rh nanoplates with the corner angles of  $60^\circ$  or  $120^\circ$ . (b) Schematic diagram of Rh nanoplates. (c) Atomic array on a  $\{111\}$  Rh facet. (d) Schematic diagram for Rh plate located perpendicular to the electron beam. (e) HRTEM image of the  $\{111\}$  Rh plate: the lattice spacing is  $0.135\text{ nm}$ . (f) Corresponding FFT pattern with the  $[111]$  zone axis.

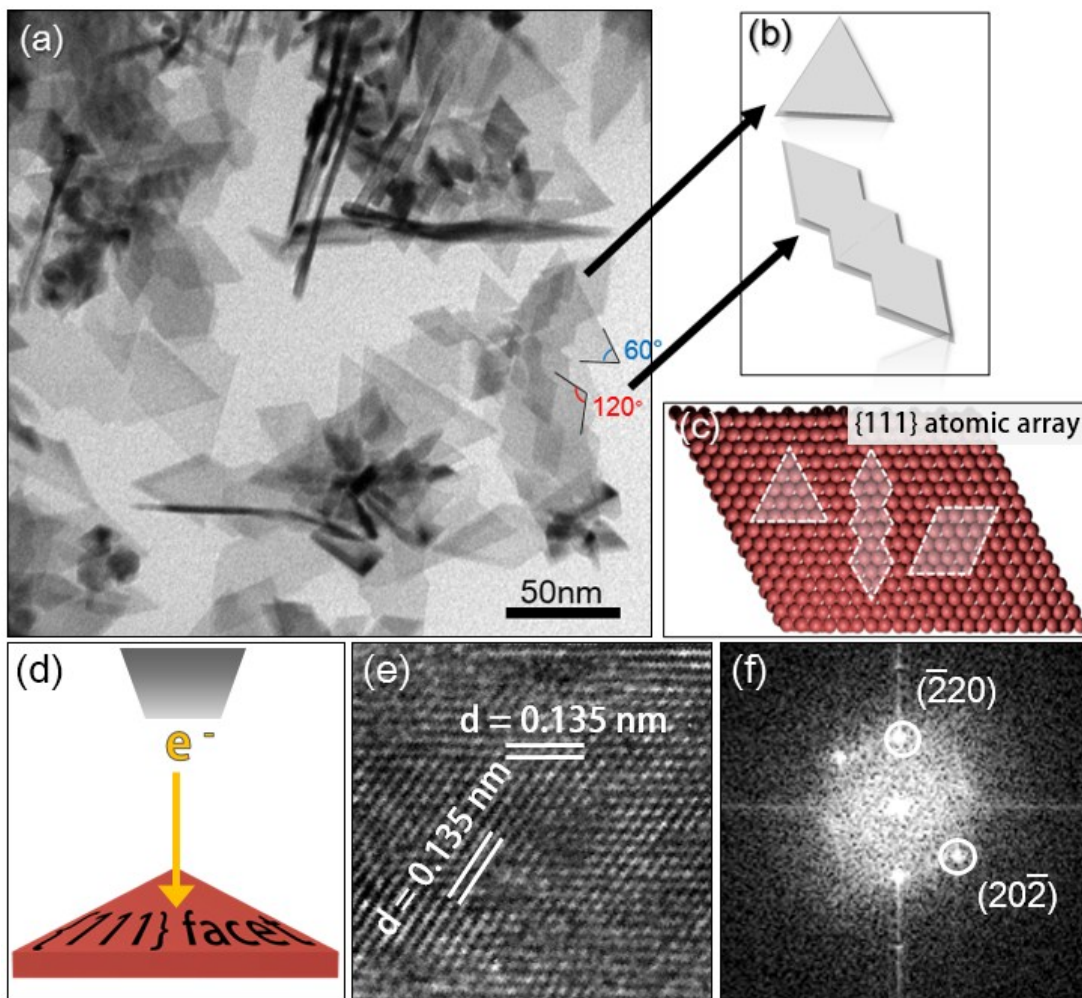



**Fig. S6.** (a) TEM image of Rh nanoplates on Au@Pt nanowires (POW) (inset: the histogram of inter-plate distance distribution for Rh nanoplates. The average inter-plate distance is about  $1.05 (\pm 0.25)$  nm.) (b) Schematic image indicates the presence of squashed octadecylamine surfactant molecules between Rh nanoplates.

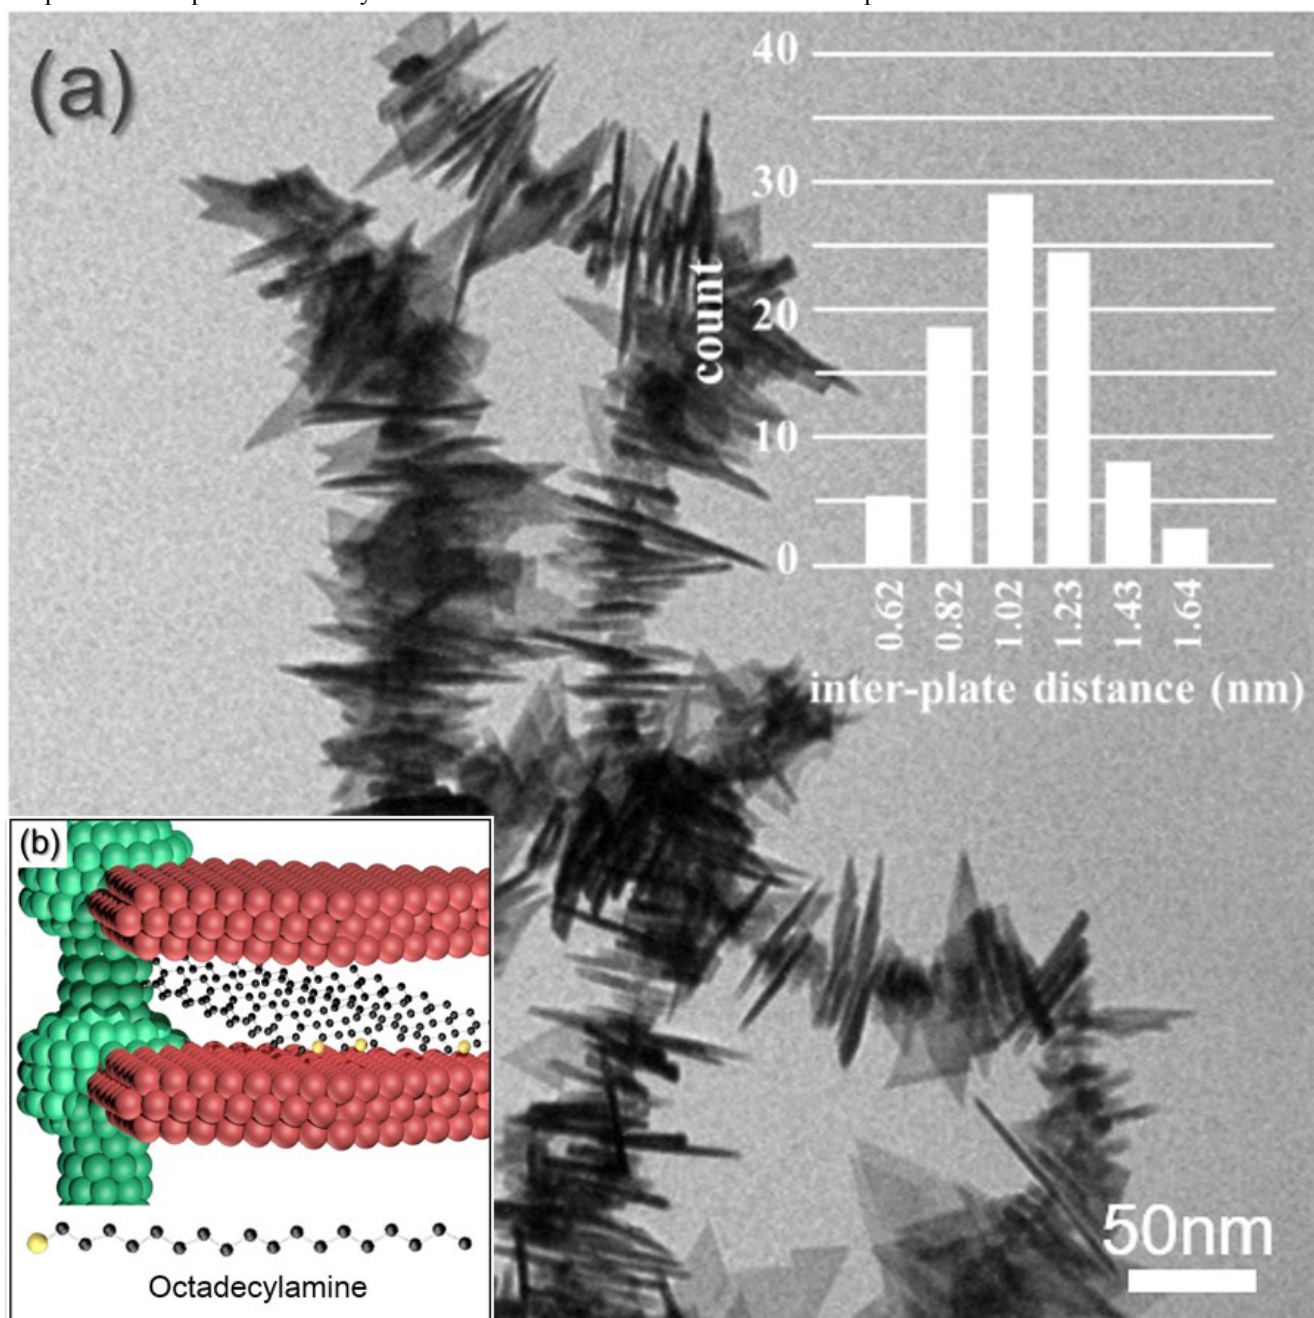

**Fig. S7.** TEM images of Rh nanoparticles synthesized under the same conditions for the synthesis of (a) Rh nanorods without Au@Pt nanowires and (b) Rh nanoplates without Au@Pt nanowires.

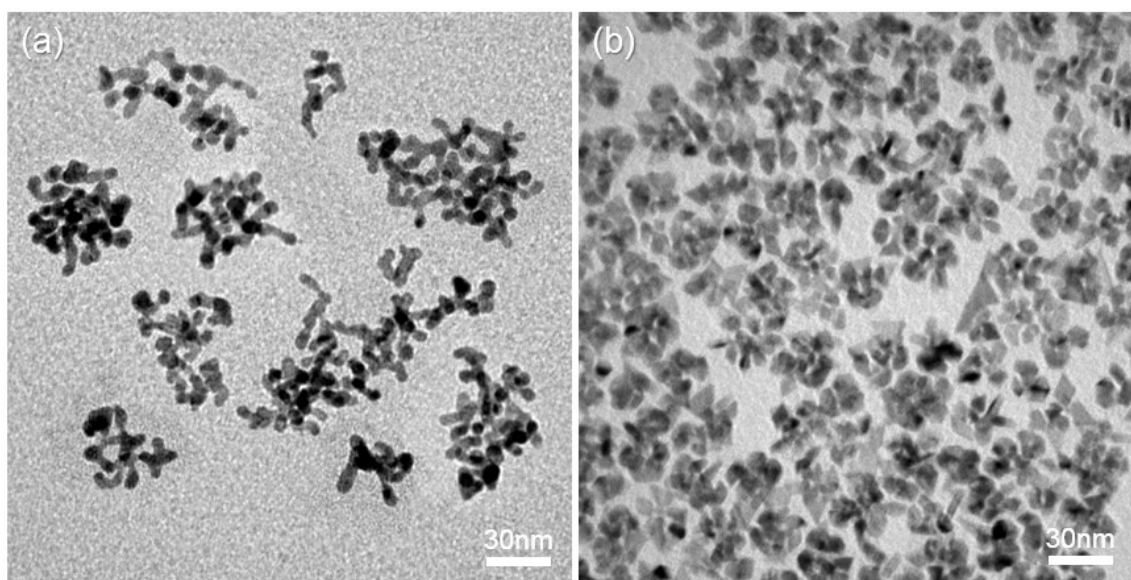

**Fig. S8.** TEM images of core-shell nanoparticles from growing Rh on spherical Au@Pt nanoparticles at 180 °C.

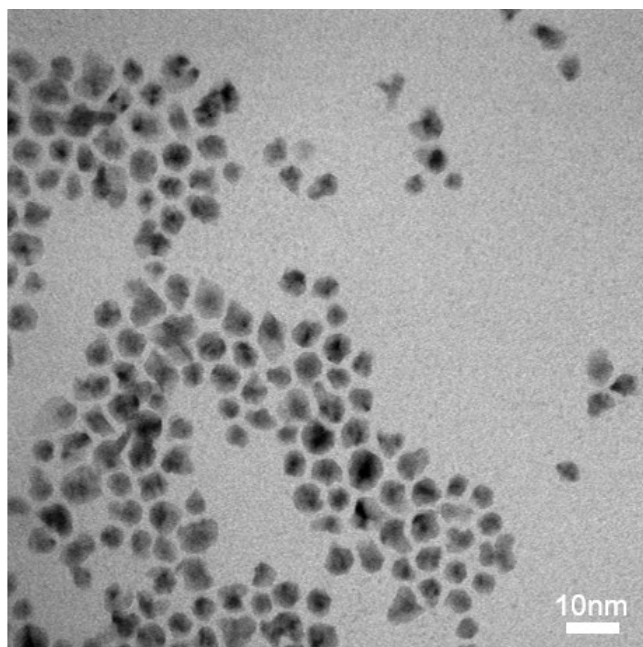

**Fig. S9.** Energy dispersive X-ray spectra and corresponding HAADF STEM images of (a) Rh nanorods on Au@Pt nanowire (ROW), (b) Rh nanoplates on Au@Pt nanowires (POW) and (c) entangled mane-like Rh on Au@Pt nanowire (EMOW).

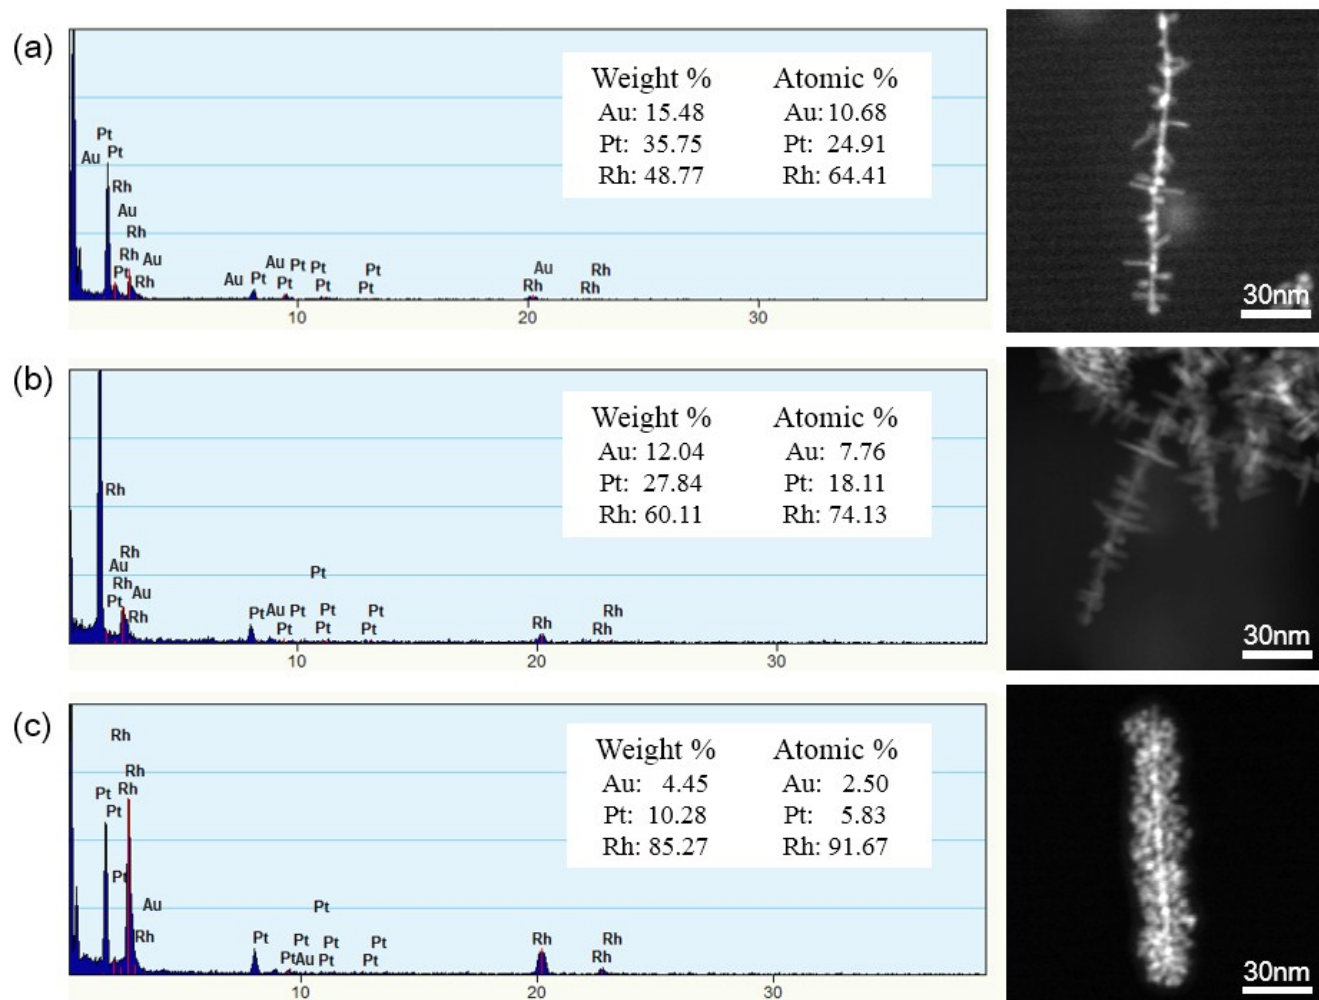



**Fig. S10.** XRD patterns of (a) Au@Pt nanowire, (b) Rh nanorods on Au@Pt nanowire (ROW), (c) Rh nanoplates on Au@Pt nanowire (POW) and (d) entangled mane-like Rh branches on Au@Pt nanowire (EMOW).

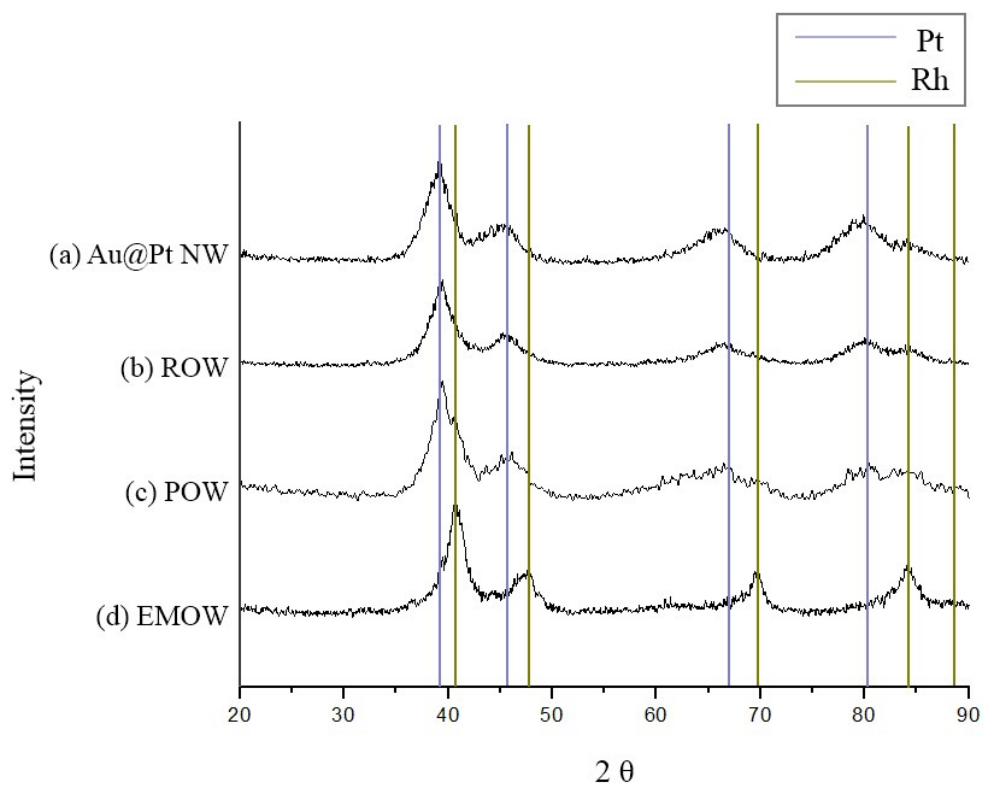

## Calculation of surface area/weight of hierarchical Rh/Au@Pt nanostructures

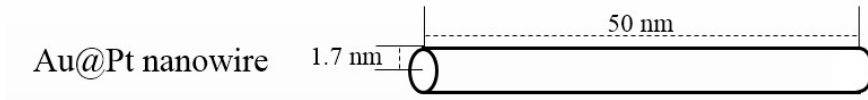

**Fig. S11.** Simplified model of Au@Pt nanowire.

(Average radius of the Au@Pt nanowires measured from 50 sites.)

Surface area of cylinder,  $A = 2\pi r^2 + 2\pi rh$

Volume of cylinder,  $V = \pi r^2 h$

(where  $r$  is the radius of the circle,  $\pi$  is 3.14 and  $h$  is height of the cylinder)

$$A_{\text{Au@Pt nanowire}} = (2 \times 3.14 \times 1.7^2) + (2 \times 3.14 \times 1.7 \times 50) \approx 551.95 \text{ (nm}^2\text{)}$$

$$V_{\text{Au@Pt nanowire}} = 3.14 \times 1.7^2 \times 50 \approx 453.73 \text{ (nm}^3\text{)}$$

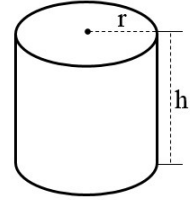

### Apply for ROW structure:

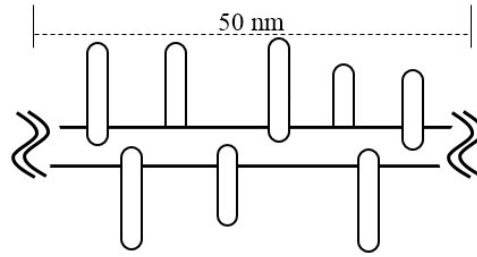

**Fig. S12.** Simplified model of Rh nanorods-on-wire structure.

(Average number Rh rods on the Au@Pt nanowires per 50 nm measured from 50 sites.)

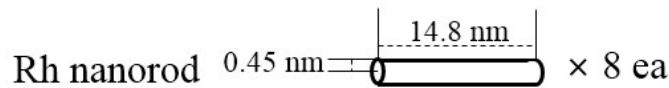

**Fig. S13.** Simplified model of Rh nanorod.

(Average radius and length of Rh rods measured from 50 Rh nanorods.)

$$A_{\text{ROW}} = n_{\text{Rh nanorod}} \times A_{\text{Rh nanorod}} + A_{\text{Au@Pt nanowire}}$$

$$V_{\text{ROW}} = n_{\text{Rh nanorod}} \times V_{\text{Rh nanorod}} + V_{\text{Au@Pt nanowire}}$$

(where  $n_{\text{Rh nanorod}}$  is average number of Rh nanorods)

$$A_{\text{ROW}} = 8 \times \{(2 \times 3.14 \times 0.45^2) + (2 \times 3.14 \times 0.45 \times 14.8)\} + 551.95 \approx 896.73 \text{ (nm}^2\text{)}$$

$$V_{\text{ROW}} = 8 \times (3.14 \times 0.45^2 \times 14.8) + 453.73 \approx 529.01 \text{ (nm}^3\text{)}$$

$$m_{\text{ROW}} = \rho_{\text{ROW}} \times V_{\text{ROW}}$$

(where  $\rho_{\text{ROW}}$  is density of ROW)

$$\frac{100}{\rho_{ROW}} = \frac{x}{\rho_{Au}} + \frac{y}{\rho_{Pt}} + \frac{z}{\rho_{Rh}}$$

( $x$ ,  $y$ ,  $z$  and  $\rho_{Au}, \rho_{Pt}, \rho_{Rh}$  are % by weight and density of Au, Pt, and Rh, respectively.)

The energy dispersive X-ray spectroscopy (EDAX) analysis of ROW structures showed the weight % of Au, Pt and Rh: 15.48 %, 35.75 % and 48.77 % (Fig. S9). Density of Au, Pt and Rh:  $19.3 \times 10^{-21} \text{ g/nm}^3$ ,  $21.5 \times 10^{-21} \text{ g/nm}^3$  and  $12.4 \times 10^{-21} \text{ g/nm}^3$ .

$$\frac{100}{\rho_{ROW}} = \frac{15.48}{19.3 \times 10^{-21}} + \frac{35.75}{21.5 \times 10^{-21}} + \frac{48.77}{12.4 \times 10^{-21}}$$

$$\rho_{ROW} = 15.630 \times 10^{-21} \text{ g/nm}^3$$

$$m_{ROW} = 15.630 \times 10^{-21} \text{ g/nm}^3 \times 529.01 \text{ nm}^3 \approx 8268.5 \times 10^{-21} \text{ g}$$

$$\frac{\text{surface area}}{\text{weight}} = \frac{896.73 \text{ nm}^2}{8268.5 \times 10^{-21} \text{ g}} \approx 0.10845 \times 10^{21} \left( \frac{\text{nm}^2}{\text{g}} \right) \approx 108.45 \left( \frac{\text{m}^2}{\text{g}} \right)$$

**Apply for POW structure:**

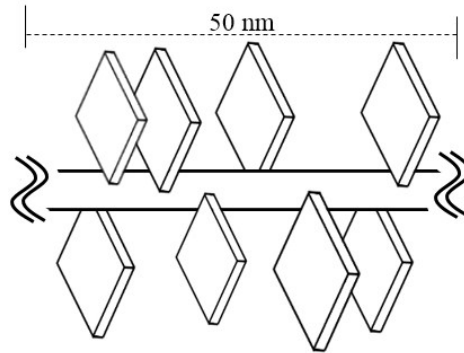

**Fig. S14.** Simplified model of Rh nanoplates-on-wire structure.

(Average number Rh plates on the Au@Pt nanowires per 50 nm measured from 50 sites.)

$$\text{Surface of rhombus pillar, } A = \left( 2 \times \frac{d_1 \times d_2}{2} \right) + (2\sqrt{d_1^2 + d_2^2} \times h)$$

$$\text{Volume of rhombus pillar, } V = \frac{d_1 \times d_2}{2} \times h$$

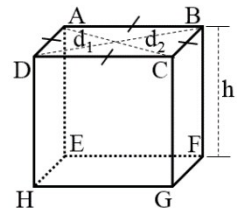

(where  $d_1$  is the length of one diagonal,  $d_2$  is the length of second diagonal and  $h$  is height of the pillar)

Rh nanoplate

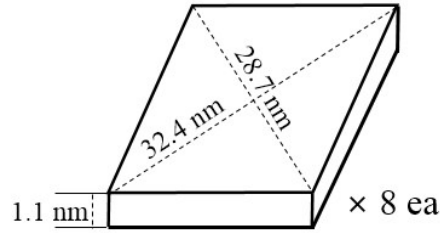

**Fig. S15.** Simplified model of Rh nanoplates.

(Average diagonals and height of Rh nanoplate measured from 50 Rh nanoplates.)

$$A_{\text{POW}} = 8 \times \left\{ \left( 2 \times \frac{28.7 \times 32.4}{2} \right) + (2 \sqrt{28.7^2 + 32.4^2} \times 1.1) \right\} + 551.95 \approx 8672.8 \text{ (nm}^2\text{)}$$

$$V_{\text{POW}} = 8 \times \left( \frac{28.7 \times 32.4}{2} \times 1.1 \right) + 453.73 \approx 4545.2 \text{ (nm}^3\text{)}$$

The EDAX analysis of POW structures showed the weight % of Au, Pt and Rh: 12.04 %, 27.84 % and 60.11 % (Figure S9).

$$\frac{100}{\rho_{\text{POW}}} = \frac{12.04}{19.3 \times 10^{-21}} + \frac{27.84}{21.5 \times 10^{-21}} + \frac{60.11}{12.4 \times 10^{-21}}$$

$$\rho_{\text{POW}} = 14.779 \times 10^{-21} \text{ g/nm}^3$$

$$m_{\text{POW}} = 14.779 \times 10^{-21} \text{ g/nm}^3 \times 4545.2 \text{ nm}^3 \approx 67174 \times 10^{-21} \text{ g}$$

$$\frac{\text{surface area}}{\text{weight}} = \frac{8672.8 \text{ nm}^2}{67174 \times 10^{-21} \text{ g}} \approx 0.12911 \times 10^{21} \left( \frac{\text{nm}^2}{\text{g}} \right) \approx 129.11 \left( \frac{\text{m}^2}{\text{g}} \right)$$

**Apply for EMOW structure:**

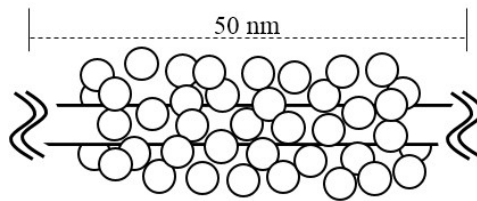

**Fig. S16.** Simplified model of entangled mane-like Rh branches-on-wire structure.

(Average number Rh branch units on the Au@Pt nanowires per 50 nm measured from 50 sites.)

$$\text{Surface of sphere, } A = 4\pi r^2$$

$$\text{Volume of sphere, } V = \frac{4}{3}\pi r^3$$

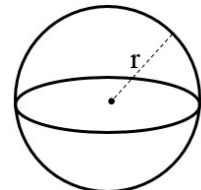

(where  $\pi$  is 3.14 and  $r$  is the radius of the sphere)

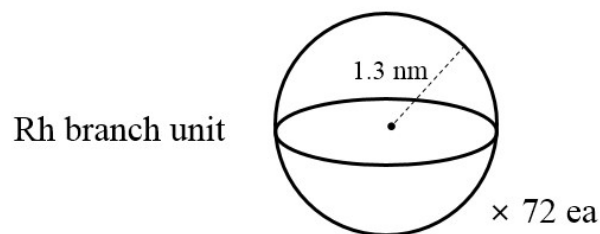

**Fig. S17.** Simplified model of Rh branch unit.

(Average radius of Rh branch units measured from 50 sites.)

$$A_{EMOW} = 72 \times \left( 4 \times 3.14 \times 1.3^2 \right) + 551.95 \approx 2080.2 \text{ (nm}^2\text{)}$$

$$V_{EMOW} = 72 \times \left( \frac{4}{3} \times 3.14 \times 1.3^3 \right) + 453.75 \approx 1116.0 \text{ (nm}^3\text{)}$$

The EDAX analysis of EMOW structures showed the weight % of Au, Pt and Rh: 4.45 %, 10.28 % and 85.27 % (Figure S9).

$$\frac{100}{\rho_{EMOW}} = \frac{4.45}{19.3 \times 10^{-21}} + \frac{10.28}{21.5 \times 10^{-21}} + \frac{85.27}{12.4 \times 10^{-21}}$$

$$\rho_{EMOW} = 13.183 \times 10^{-21} \text{ g/nm}^3$$

$$m_{EMOW} = 13.183 \times 10^{-21} \text{ g/nm}^3 \times 1116.0 \text{ nm}^3 \approx 14712 \times 10^{-21} \text{ g}$$

$$\frac{\text{surface area}}{\text{weight}} = \frac{2080.2 \text{ nm}^2}{14712 \times 10^{-21} \text{ g}} \approx 0.14140 \times 10^{21} \left( \frac{\text{nm}^2}{\text{g}} \right) \approx 140.40 \left( \frac{\text{m}^2}{\text{g}} \right)$$
